# Supplementary material for: Oxidant sensor in the cGMP-binding pocket of PKGIα regulates nitroxyl-mediated kinase activity
Source: PubMed Central journal article supplement (PMC5577323; doi:10.1038/s41598-017-09275-1), 2017-08-30

# Oxidant sensor in the cGMP-binding pocket of PKGI $\alpha$ regulates nitroxyl-mediated kinase activity

Sonia Donzelli<sup>a,b,#,\*</sup>, Mara Goetz<sup>a,b,\*</sup>, Kjestine Schmidt<sup>c</sup>, Markus Wolters<sup>d</sup>, Konstantina Stathopoulou<sup>a,b</sup>, Simon Diering<sup>a,b</sup>, Oleksandra Prsyazhna<sup>e</sup>, Volkan Polat<sup>a,b</sup>, Jenna Scotcher<sup>e</sup>, Christian Dees<sup>f</sup>, Hariharan Subramanian<sup>g,b</sup>, Elke Butt<sup>f</sup>, Alisa Kamynina<sup>e</sup>, Sophie Schobesberger<sup>a,b</sup>, S. Bruce King<sup>h</sup>, Viacheslav O. Nikolaev<sup>g,b</sup>, Cor de Wit<sup>c</sup>, Lars I. Leichert<sup>i</sup>, Robert Feil<sup>d</sup>, Philip Eaton<sup>e,1</sup>, Friederike Cuello<sup>a,b,1</sup>

<sup>a</sup>Department of Experimental Pharmacology and Toxicology, Cardiovascular Research Center, University Medical Center Hamburg-Eppendorf, Martinistrasse 52, 20246 Hamburg, Germany.

<sup>b</sup>DZHK (German Center for Cardiovascular Research), partner site Hamburg/Kiel/Lübeck, University Medical Center Hamburg-Eppendorf, Martinistrasse 52, 20246 Hamburg, Germany.

<sup>c</sup>Institute of Physiology, University of Lübeck, Ratzeburger Allee 160, 23562 Lübeck, Germany.

<sup>d</sup>Interfaculty Institute of Biochemistry, University of Tübingen, Hoppe-Seyler-Str. 4, 72076 Tübingen, Germany.

<sup>e</sup>King's College London, Cardiovascular Division, British Heart Foundation Centre of Excellence, the Rayne Institute, St Thomas' Hospital, London SE17EH, United Kingdom.

<sup>f</sup>Institute of Experimental Biomedicine II, University Medical Center Würzburg, Grombühlstraße 12, 97080 Würzburg, Germany.

<sup>g</sup>Institute of Experimental Cardiovascular Research, University Medical Center Hamburg-Eppendorf, Martinistrasse 52, 20246 Hamburg, Germany.

<sup>h</sup>Department of Chemistry, Wake Forest University, Winston-Salem, North Carolina 27109, USA.

<sup>i</sup>Institute of Biochemistry and Pathobiochemistry - Microbial Biochemistry, Ruhr University Bochum, Universitätsstrasse 150, 44780 Bochum, Germany.

<sup>#</sup>present address: Laboratory of Molecular and Chemical Biology of Neurodegeneration, Brain Mind Institute, Ecole Polytechnique Fédérale de Lausanne (EPFL), 1015 Lausanne, Switzerland

\*joint first author <sup>1</sup>joint corresponding author

Supplementary Figure 1:

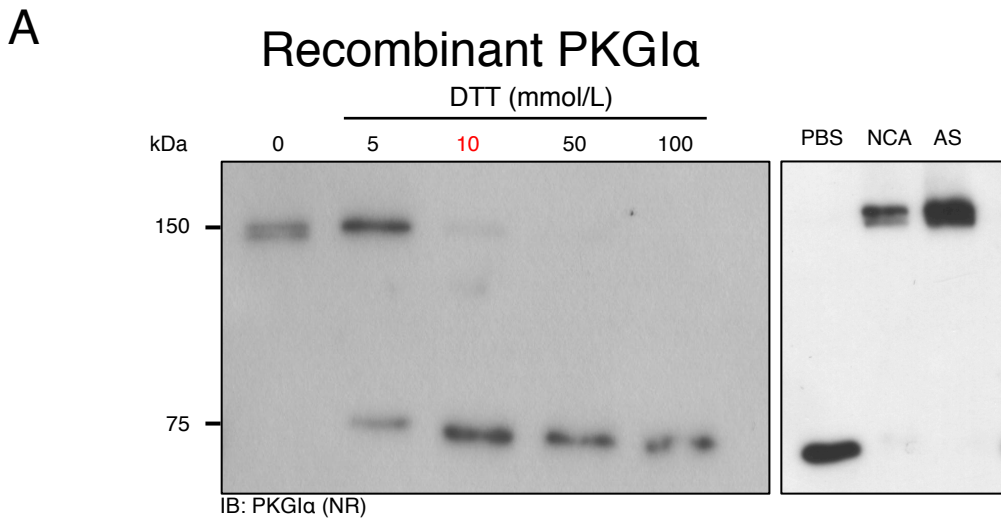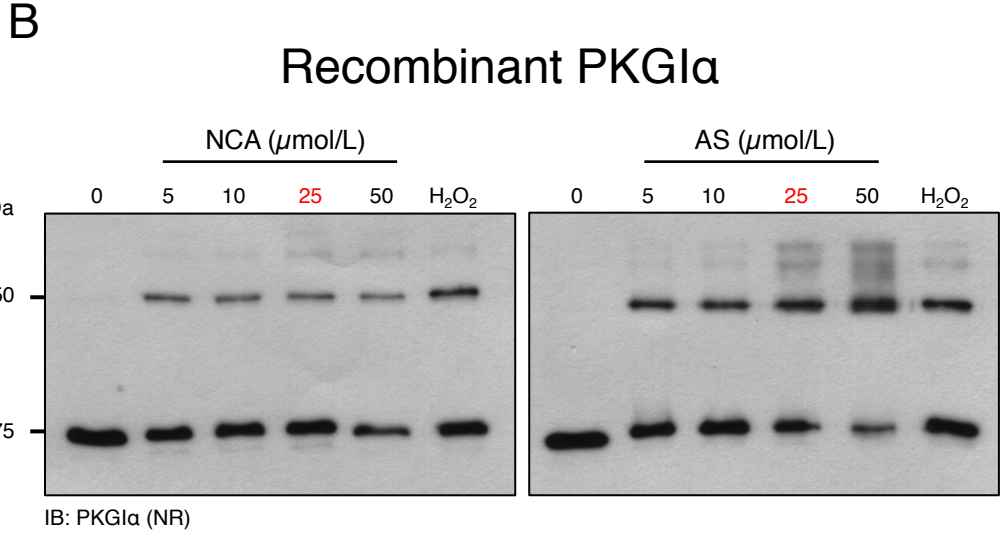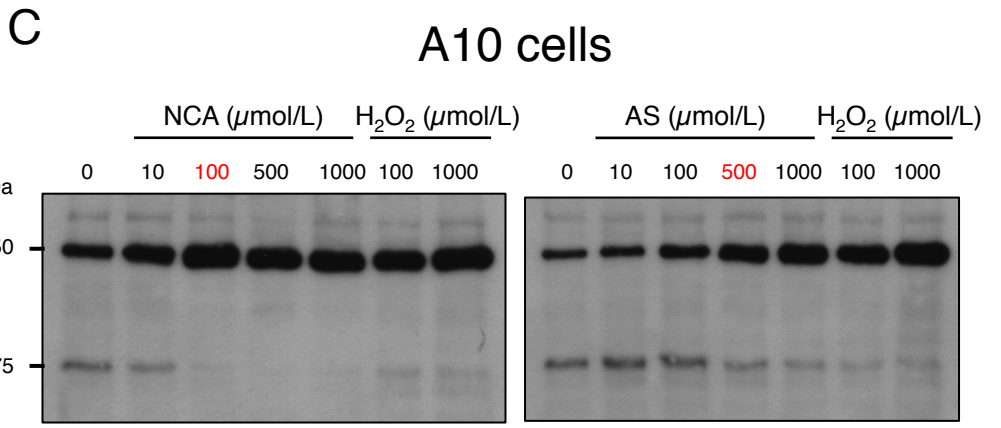

**Suppl. Fig. 1. (A)** Recombinant PKGI $\alpha$  was exposed to increasing concentrations of DTT (0-100 mmol/L) for 10 min (left panel), buffer exchange performed and subsequently exposed to vehicle (PBS), NCA (25  $\mu$ mol/L) or AS (25  $\mu$ mol/L) for 15 min and western immunoblot analysis performed under non-reducing conditions. **(B)** Recombinant PKGI $\alpha$  was pretreated with 10 mmol/L DTT for 10 min and subsequently exposed to increasing concentrations of NCA (0-50  $\mu$ mol/L), AS (0-50  $\mu$ mol/L) or H<sub>2</sub>O<sub>2</sub> (100  $\mu$ mol/L) for 15 min. **(C)** Rat vascular smooth muscle cells (A10) were exposed to increasing concentrations of NCA (0-1000  $\mu$ mol/L; 30 min), AS (0-1000  $\mu$ mol/L; 15 min) or 100-1000  $\mu$ mol/L H<sub>2</sub>O<sub>2</sub> for 10 min, cells harvested and western immunoblot analysis performed under non-reducing gel conditions for PKGI $\alpha$ .

# Supplementary information: full blots for Figure 2

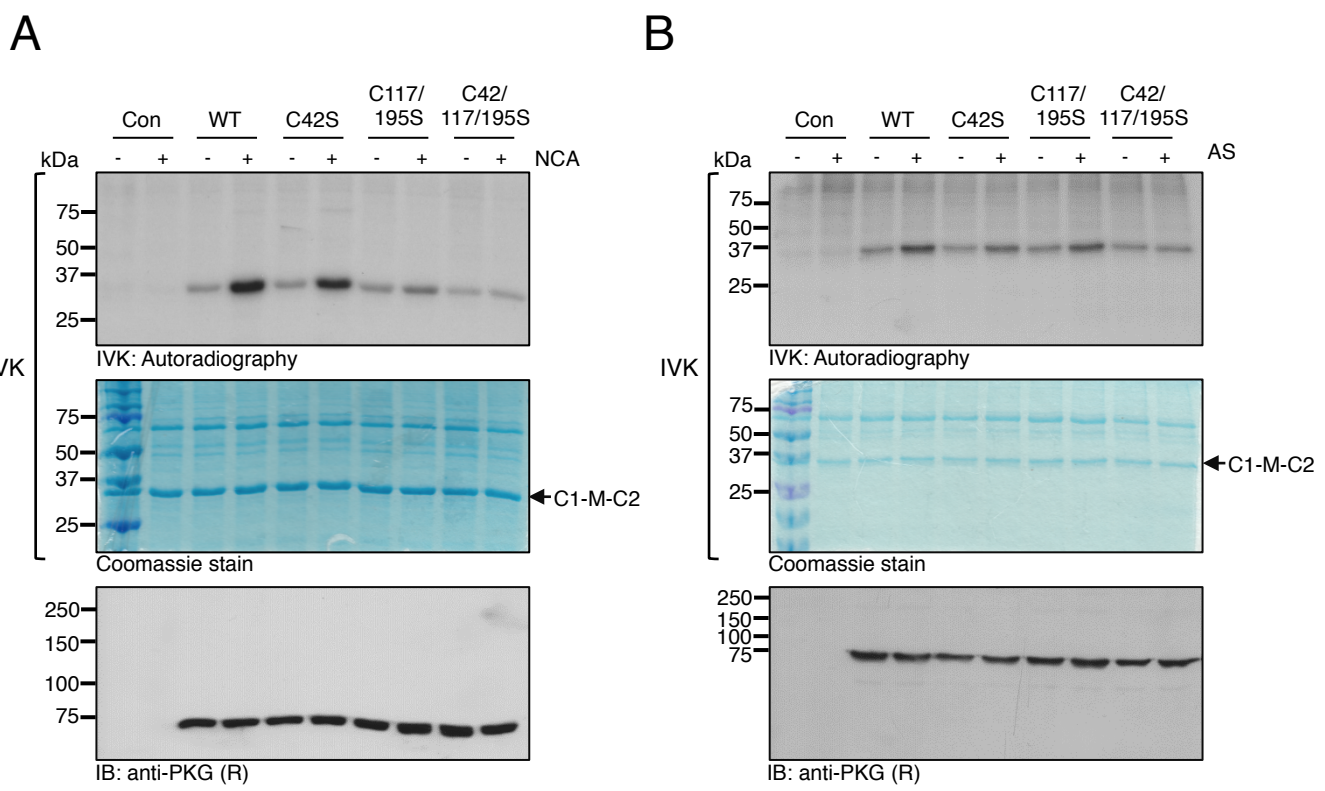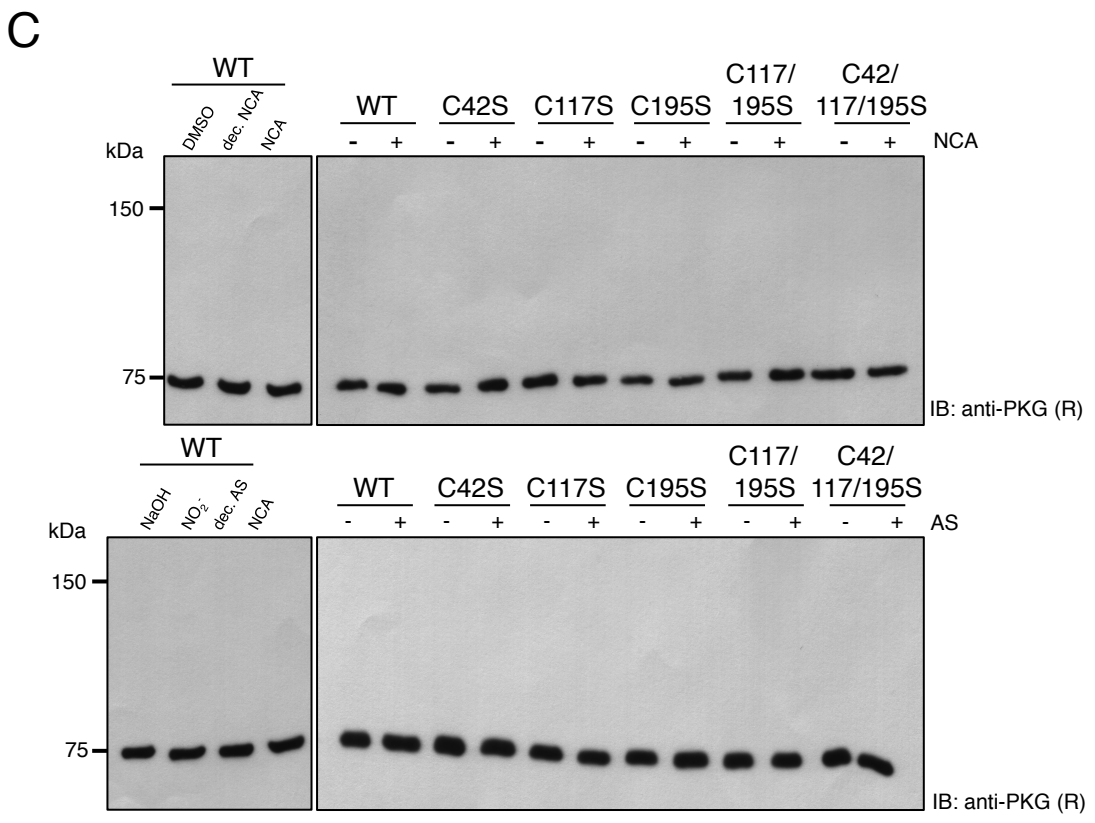

Supplement: 41598_2017_9275_MOESM1_ESM.pdf [file 41598_2017_9275_MOESM1_ESM.pdf]
